# Supplementary material
Source: Springer Nature journal article supplement (https://www.springermedizin.de/resource/supplementary/12943_2010_771_MOESM12_ESM.pdf/9554780)

# HepG2

|      |   |   |   |   |   |
|------|---|---|---|---|---|
| EGF  | - | + | + | - | - |
| IGF2 | - | - | - | + | + |
| FTS  | - | - | + | - | + |

P-ERK

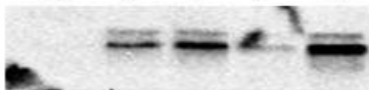

ERK

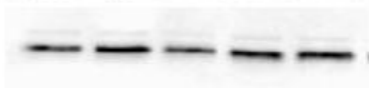

P-Akt (Ser473)

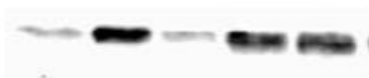

P-Akt (Thr308)

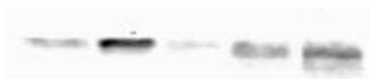

Akt

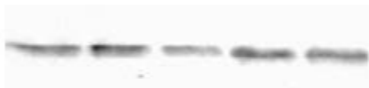

P-GSK3b

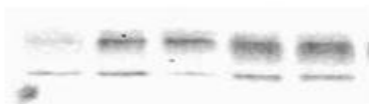

GSK3b

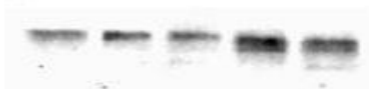

P-p70

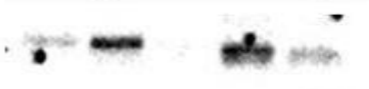

p70

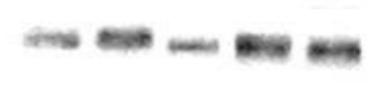

Supplement: MOESM12 [file 9554780]
